# Supplementary material for: Influence of interface combination of reduced graphene oxide/P25 composites on their visible photocatalytic performance
Source: Royal Society of Chemistry journal article supplement (doi:10.1039/c4ra05681g), 2014-01-01
Supplement: c4ra05681g1.pdf [file c4ra05681g1.pdf]

**Electronic Supplementary Materials for [RSC Advances](#)**

**Ref. No.: RA-ART-06-2014-005681**

**Influence of interface combination of reduced graphene oxide/P25 composites on their visible photocatalytic performance**

Yueli Liu, Keqiang Chen, Mengyun Xiong, Peng Zhou, Zhuoyin Peng, Guojie Yang, Yuqing

Cheng, Ruibing Wang, Wen Chen\*

---

\* To whom correspondence should be addressed:

[\*] State Key Laboratory of Advanced Technology for Materials Synthesis and Processing, and School of Materials Science and Engineering, Wuhan University of Technology, Wuhan, 430070 (P. R. China)

Correspondent:

[\*] Prof. W. Chen

Tel.: +86-27-8765-1107

Fax: +86-27-8776-0129

E-mail: [chenw@whut.edu.cn](mailto:chenw@whut.edu.cn) (Wen Chen)

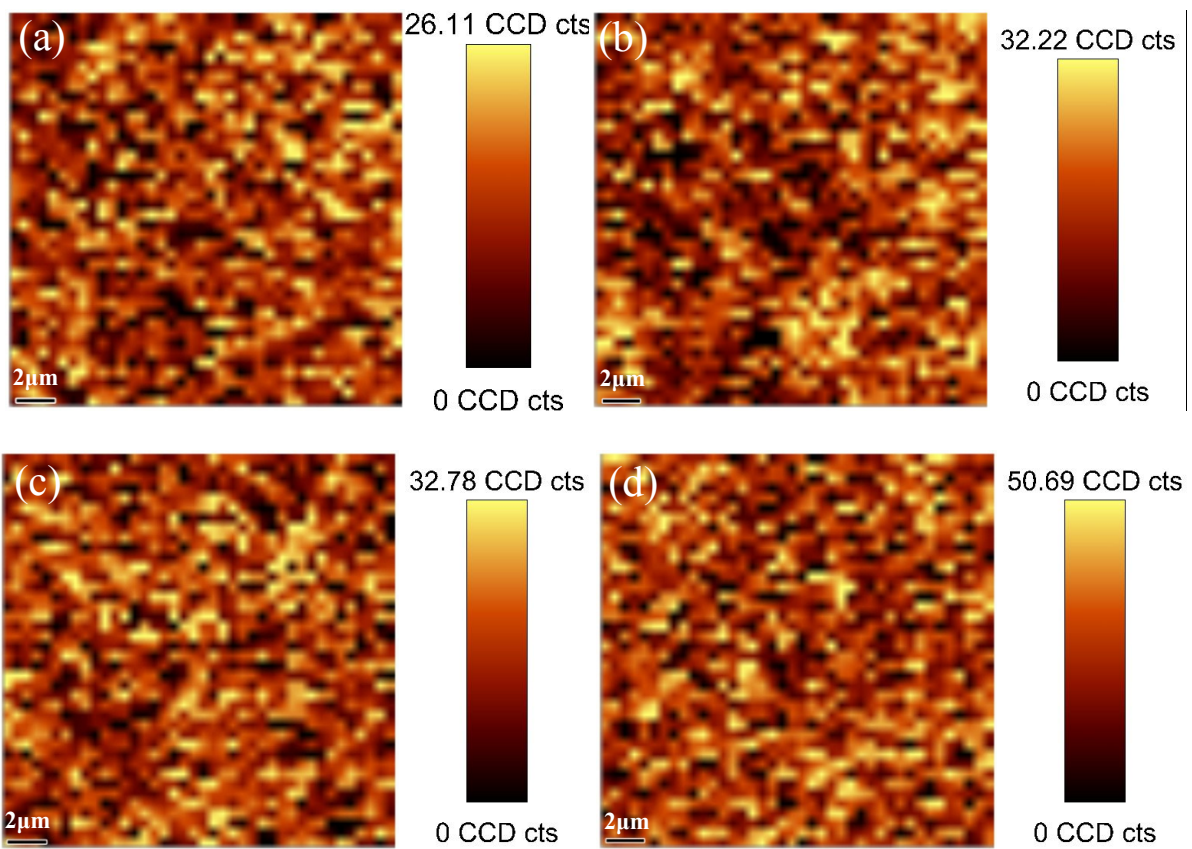

Fig. S1. Raman mapping images of RGO (2D mode) for the various RGO/P25 composite: (a) 0.10 wt%; (b) 0.25 wt%; (c) 0.50 wt%; (d) 1.00 wt%

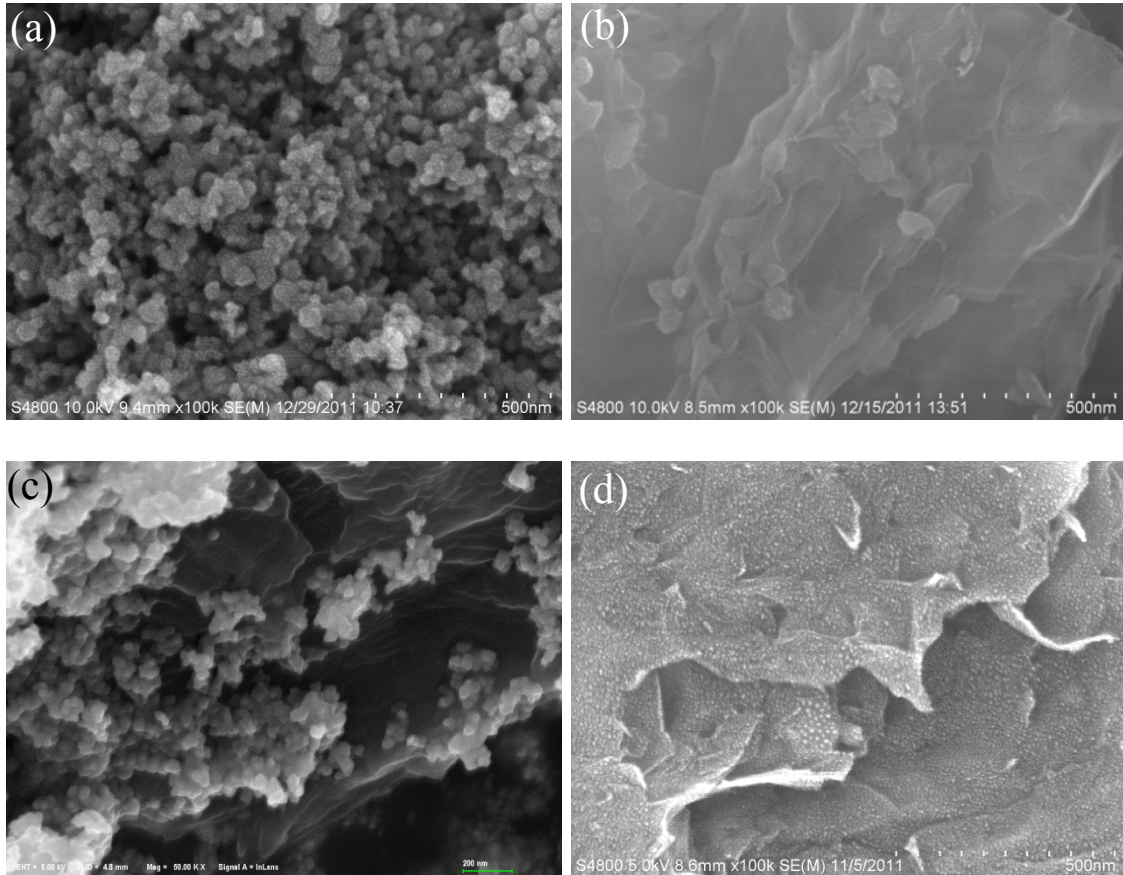

Fig. S2 SEM images of the various RGO/P25 composites: (a) 0.10 wt%; (b) 0.25 wt%; (c) 0.50 wt%; (d) 1.00 wt%

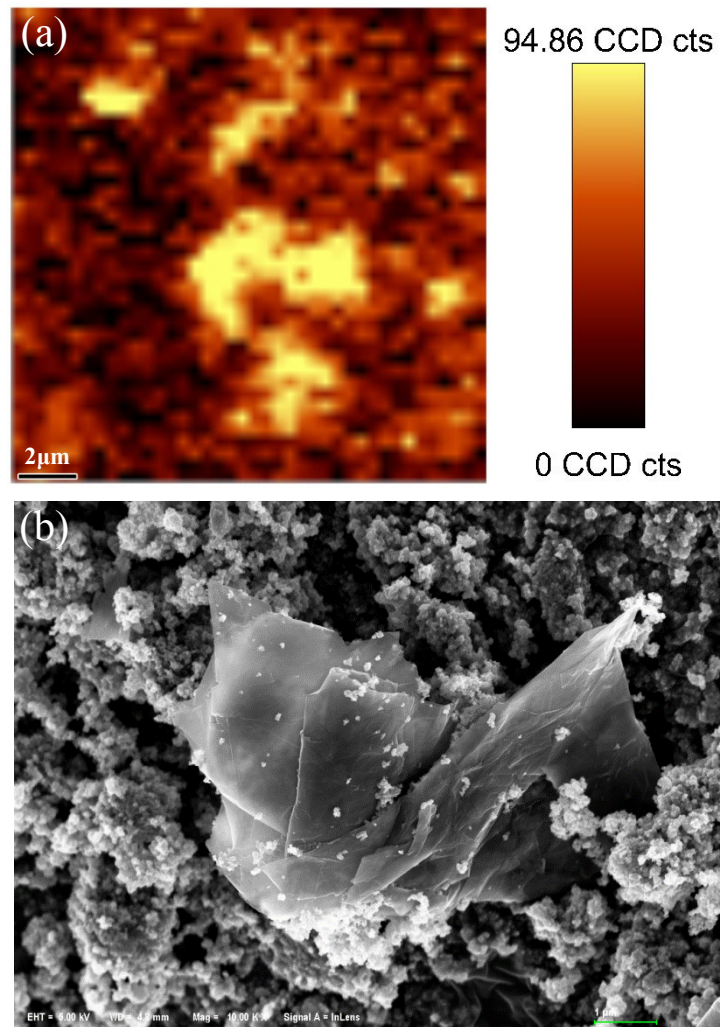

Fig. S3 (a) Raman mapping image; (b) SEM image the 0.50 wt% RGO/P25 composite synthesized by mechanical mixing method
